# Supplementary material for: Membrane Lipid Composition and Amino Acid Excretion Patterns of Methanothermococcus okinawensis Grown in the Presence of Inhibitors Detected in the Enceladian Plume
Source: PubMed Central journal article supplement (PMC6958431; doi:10.3390/life9040085), 2019-11-14
Supplement: life-09-00085-s001.pdf [file life-09-00085-s001.pdf]

Article

# Membrane Lipid Composition and Amino Acid Excretion Patterns of *Methanothermococcus Okinawensis* grown in the Presence of Inhibitors Detected in the Enceladian Plume

Ruth-Sophie Taubner<sup>1,‡</sup>, Lydia M. F. Baumann<sup>2,‡</sup>, Thorsten Bauersachs<sup>3</sup>, Elisabeth L. Clifford<sup>4</sup>, Barbara Mähnert<sup>4</sup>, Barbara Reischl<sup>1</sup>, Richard Seifert<sup>2</sup>, Jörn Peckmann<sup>2</sup>, Simon-K. M. Rittmann<sup>1</sup> and Daniel Birgel<sup>2,\*</sup>

<sup>1</sup> Archaea Physiology & Biotechnology Group, Archaea Biology and Ecogenomics Division, Department of Ecogenomics and Systems Biology, Universität Wien, 1010 Vienna, Austria.

<sup>2</sup> Institute for Geology, Universität Hamburg, 20146 Hamburg, Germany.

<sup>3</sup> Institute of Geosciences, Department of Organic Geochemistry, Christian-Albrechts-Universität, 24118 Kiel, Germany.

<sup>4</sup> Department of Limnology and Bio-Oceanography, Universität Wien, 1010 Vienna, Austria.

<sup>‡</sup> R.-S.T. and L.M.F.B. contributed equally to this work.

\* Correspondence: daniel.birgel@uni-hamburg.de

Received: 8 October 2019; Accepted: 11 November 2019; Published: date

**Table S1:** Elution gradient applied for the separation of primary dissolved free amino acids by high performance liquid chromatography (HPLC). Eluent A (polar phase): 40 mM NaH<sub>2</sub>PO<sub>4</sub> buffer (pH 7.8 adjusted with NaOH pellets in Milli-Q water; Sigma-Aldrich); B (non-polar phase): 1000/100/2–Methanol (HPLC grade, Sigma-Aldrich)/Milli-Q water/Trifluoroacetic acid (HPLC grade, Roth); C: Tetrahydrofuran (HPLC grade; Sigma-Aldrich), total time: 90 min.

| Time (min) | A % | B % | C % |
|------------|-----|-----|-----|
| 0          | 90  | 10  | 0   |
| 2          | 90  | 7.5 | 2.5 |
| 40         | 68  | 30  | 2.0 |
| 42         | 64  | 35  | 1.0 |
| 75         | 35  | 65  | 0   |
| 77         | 0   | 100 | 0   |
| 80         | 90  | 10  | 0   |
| 90         | 90  | 10  | 0   |

**Table S2:** ANOVA analysis of DoE settings. Significant model for OD<sub>max</sub>.OD<sub>max</sub>

Transform: Square Root

Constant: 0

| Source                     | Sum of Squares | df | Mean Square | F-value | p-value              |
|----------------------------|----------------|----|-------------|---------|----------------------|
| <b>Model</b>               | 3.88           | 5  | 0.7752      | 320.51  | < 0.0001 significant |
| A-NH <sub>4</sub> Cl       | 0.7727         | 1  | 0.7727      | 319.46  | < 0.0001             |
| B- H <sub>2</sub> CO (37%) | 2.41           | 1  | 2.41        | 996.27  | < 0.0001             |
| AB                         | 0.5444         | 1  | 0.5444      | 225.09  | < 0.0001             |
| A <sup>2</sup>             | 0.0335         | 1  | 0.0335      | 13.87   | 0.0006               |
| B <sup>2</sup>             | 0.0966         | 1  | 0.0966      | 39.93   | < 0.0001             |
| <b>Residual</b>            | 0.0919         | 38 | 0.0024      |         |                      |
| Lack of Fit                | 0.0617         | 9  | 0.0069      | 6.57    | < 0.0001 significant |
| Pure Error                 | 0.0302         | 29 | 0.0010      |         |                      |
| <b>Cor Total</b>           | 3.97           | 43 |             |         |                      |

**Fit Statistics**

|                  |        |                                |         |
|------------------|--------|--------------------------------|---------|
| <b>Std. Dev.</b> | 0.0492 | <b>R<sup>2</sup></b>           | 0.9768  |
| <b>Mean</b>      | 0.9833 | <b>Adjusted R<sup>2</sup></b>  | 0.9738  |
| <b>C.V. %</b>    | 5.00   | <b>Predicted R<sup>2</sup></b> | 0.9671  |
|                  |        | <b>Adeq Precision</b>          | 48.5543 |

**Final Equation in Terms of Actual Factors**

$$\begin{aligned} \text{Sqrt}(\text{OD}_{\text{max}}) = & \\ & +0.890366 \\ & +0.075335 \text{ NH}_4\text{Cl} \\ & +0.004703 \text{ H}_2\text{CO (37\%)} \\ & -0.000685 \text{ NH}_4\text{Cl} * \text{H}_2\text{CO (37\%)} \\ & -0.002394 \text{ NH}_4\text{Cl}^2 \\ & -0.000016 \text{ H}_2\text{CO (37\%)}^2 \end{aligned}$$

**Table S3:** Mean values of the  $OD_{max}$ , the turnover rate max, and of each lipid in percent of total lipids of all samples of one experiment. For the  $OD_{max}$  and the turnover rate max triplicates (n = 3) were used except for "F" (n = 2). Further, for the lipid analysis, one datapoint of each setting "E", "J", and "N" had to be excluded (n=2). Values of extreme values setting are mean values of four samples (n = 4).

## DoE

|                                      | K     | E     | B     | F     | A     | I     | G     | C     | M     | N     | O     | J     | D     | L     | H     |
|--------------------------------------|-------|-------|-------|-------|-------|-------|-------|-------|-------|-------|-------|-------|-------|-------|-------|
| $OD_{max}$                           | 1.71  | 1.62  | 1.53  | 1.52  | 1.51  | 1.27  | 1.17  | 1.16  | 1.13  | 1.11  | 1.10  | 0.59  | 0.21  | 0.20  | 0.20  |
| Turnover rate max [h <sup>-1</sup> ] | 0.096 | 0.096 | 0.096 | 0.095 | 0.096 | 0.098 | 0.098 | 0.098 | 0.096 | 0.097 | 0.093 | 0.086 | 0.031 | 0.028 | 0.029 |
| Archaeol                             | 64.5% | 68.3% | 63.8% | 64.4% | 63.0% | 63.4% | 75.4% | 72.6% | 71.0% | 68.7% | 72.9% | 71.0% | 69.1% | 74.0% | 68.6% |
| Macr. Ar.                            | 29.7% | 25.7% | 30.2% | 28.8% | 29.2% | 30.3% | 19.3% | 19.7% | 21.4% | 25.1% | 18.0% | 23.7% | 23.5% | 18.1% | 23.3% |
| GTGT-0                               | 0.2%  | 0.3%  | 0.3%  | 0.3%  | 0.4%  | 0.3%  | 0.5%  | 0.7%  | 0.4%  | 0.5%  | 0.6%  | 0.4%  | 0.4%  | 0.8%  | 0.4%  |
| GDGT-0                               | 3.9%  | 4.2%  | 4.1%  | 4.7%  | 5.1%  | 3.7%  | 3.5%  | 5.2%  | 4.7%  | 3.6%  | 5.6%  | 2.7%  | 4.8%  | 4.6%  | 4.5%  |
| GMGT-0                               | 1.1%  | 1.1%  | 1.1%  | 1.2%  | 1.7%  | 1.6%  | 0.8%  | 1.2%  | 1.8%  | 1.5%  | 2.0%  | 1.6%  | 1.6%  | 1.8%  | 2.2%  |
| GMGT-0'                              | 0.5%  | 0.5%  | 0.4%  | 0.5%  | 0.7%  | 0.8%  | 0.4%  | 0.6%  | 0.7%  | 0.6%  | 0.8%  | 0.7%  | 0.6%  | 0.6%  | 0.9%  |

## Extreme values setting

|                                      | Min   | Me    | Am    | Fo    |
|--------------------------------------|-------|-------|-------|-------|
| $OD_{max}$                           | 1.10  | 1.08  | 0.52  | 0.22  |
| Turnover rate max [h <sup>-1</sup> ] | 0.094 | 0.088 | 0.081 | 0.051 |
| Archaeol                             | 33.4% | 33.5% | 41.6% | 73.5% |
| Macr. Ar.                            | 42.3% | 44.9% | 43.0% | 15.5% |
| GTGT-0                               | 0.3%  | 0.3%  | 0.4%  | 1.1%  |
| GDGT-0                               | 12.6% | 9.7%  | 7.8%  | 6.9%  |
| GMGT-0                               | 7.6%  | 7.7%  | 4.8%  | 2.1%  |
| GMGT-0'                              | 3.8%  | 4.0%  | 2.5%  | 0.8%  |

**Table S4:** ANOVA analysis of DoE settings. Significant model for GTGT-0.**GTGT-0**

Transform: Inverse Sqrt

Constant: 0

| Source               | Sum of Squares | df | Mean Square | F-value | p-value                   |
|----------------------|----------------|----|-------------|---------|---------------------------|
| <b>Model</b>         | 0.1018         | 1  | 0.1018      | 4.52    | <b>0.0392</b> significant |
| C-CH <sub>3</sub> OH | 0.1018         | 1  | 0.1018      | 4.52    | <b>0.0392</b>             |
| <b>Residual</b>      | 0.9912         | 44 | 0.0225      |         |                           |
| Lack of Fit          | 0.3624         | 13 | 0.0279      | 1.37    | 0.2269 not significant    |
| Pure Error           | 0.6289         | 31 | 0.0203      |         |                           |
| <b>Cor Total</b>     | 1.09           | 45 |             |         |                           |

**Fit Statistics**

|                  |        |                                |        |
|------------------|--------|--------------------------------|--------|
| <b>Std. Dev.</b> | 0.1501 | <b>R<sup>2</sup></b>           | 0.0931 |
| <b>Mean</b>      | 0.6682 | <b>Adjusted R<sup>2</sup></b>  | 0.0725 |
| <b>C.V. %</b>    | 22.46  | <b>Predicted R<sup>2</sup></b> | 0.0212 |
|                  |        | <b>Adeq Precision</b>          | 5.4241 |

**Final Equation in Terms of Actual Factors**

$$1/\text{Sqrt}(\text{GTGT } 0a) =$$

$$+0.576726$$

$$+0.000841 \text{ CH}_3\text{OH}$$

**Table S5:** ANOVA analysis of DoE settings. Significant model for GMGT-0'.

**GMGT-0'**

Transform: Inverse Sqrt

Constant: 0

| Source                    | Sum of Squares | df | Mean Square | F-value | p-value                   |
|---------------------------|----------------|----|-------------|---------|---------------------------|
| <b>Model</b>              | 0.2969         | 6  | 0.0495      | 3.22    | <b>0.0115</b> significant |
| A-NH <sub>4</sub> Cl      | 0.0013         | 1  | 0.0013      | 0.0824  | 0.7757                    |
| B-H <sub>2</sub> CO (37%) | 0.0220         | 1  | 0.0220      | 1.43    | 0.2389                    |
| C-CH <sub>3</sub> OH      | 0.0524         | 1  | 0.0524      | 3.41    | 0.0725                    |
| A <sup>2</sup>            | 0.0332         | 1  | 0.0332      | 2.16    | 0.1498                    |
| B <sup>2</sup>            | 0.1168         | 1  | 0.1168      | 7.59    | <b>0.0089</b>             |
| C <sup>2</sup>            | 0.1397         | 1  | 0.1397      | 9.09    | <b>0.0045</b>             |
| <b>Residual</b>           | 0.5997         | 39 | 0.0154      |         |                           |
| Lack of Fit               | 0.2195         | 8  | 0.0274      | 2.24    | 0.0516 not significant    |
| Pure Error                | 0.3801         | 31 | 0.0123      |         |                           |
| <b>Cor Total</b>          | 0.8966         | 45 |             |         |                           |

**Fit Statistics**

|                  |        |                                |        |
|------------------|--------|--------------------------------|--------|
| <b>Std. Dev.</b> | 0.1240 | <b>R<sup>2</sup></b>           | 0.3312 |
| <b>Mean</b>      | 0.5235 | <b>Adjusted R<sup>2</sup></b>  | 0.2283 |
| <b>C.V. %</b>    | 23.69  | <b>Predicted R<sup>2</sup></b> | 0.0443 |
|                  |        | <b>Adeq Precision</b>          | 5.6268 |

**Final Equation in Terms of Actual Factors**

|                   |                                      |
|-------------------|--------------------------------------|
| 1/Sqrt(GMGT 0a) = |                                      |
| -0.131956         |                                      |
| +0.048749         | NH <sub>4</sub> Cl                   |
| +0.004564         | H <sub>2</sub> CO (37%)              |
| +0.005168         | CH <sub>3</sub> OH                   |
| -0.002589         | NH <sub>4</sub> Cl <sup>2</sup>      |
| -0.000019         | H <sub>2</sub> CO (37%) <sup>2</sup> |
| -0.000021         | CH <sub>3</sub> OH <sup>2</sup>      |

**Table S6:** ANOVA analysis of DoE settings. Significant model for GTGT/GMGT (including both GMGT isomers).**GTGT/GMGT**

Transform: Base 10 Log

Constant: 0

| Source                    | Sum of Squares | df | Mean Square | F-value | p-value                   |
|---------------------------|----------------|----|-------------|---------|---------------------------|
| <b>Model</b>              | 0.3236         | 3  | 0.1079      | 3.22    | <b>0.0321</b> significant |
| A-NH <sub>4</sub> Cl      | 0.0020         | 1  | 0.0020      | 0.0612  | 0.8058                    |
| B-H <sub>2</sub> CO (37%) | 0.1654         | 1  | 0.1654      | 4.94    | <b>0.0317</b>             |
| AB                        | 0.2809         | 1  | 0.2809      | 8.39    | <b>0.0060</b>             |
| <b>Residual</b>           | 1.41           | 42 | 0.0335      |         |                           |
| Lack of Fit               | 0.2739         | 11 | 0.0249      | 0.6817  | 0.7449 not significant    |
| Pure Error                | 1.13           | 31 | 0.0365      |         |                           |
| <b>Cor Total</b>          | 1.73           | 45 |             |         |                           |

**Fit Statistics**

|                  |         |                                |        |
|------------------|---------|--------------------------------|--------|
| <b>Std. Dev.</b> | 0.1830  | <b>R<sup>2</sup></b>           | 0.1871 |
| <b>Mean</b>      | -0.7435 | <b>Adjusted R<sup>2</sup></b>  | 0.1290 |
| <b>C.V. %</b>    | 24.61   | <b>Predicted R<sup>2</sup></b> | 0.0224 |
|                  |         | <b>Adeq Precision</b>          | 5.3544 |

**Final Equation in Terms of Actual Factors**

|                                                        |
|--------------------------------------------------------|
| Log <sub>10</sub> (GTGT/GMGT) =                        |
| -0.403862                                              |
| -0.052201 NH <sub>4</sub> Cl                           |
| -0.003250 H <sub>2</sub> CO (37%)                      |
| +0.000492 NH <sub>4</sub> Cl * H <sub>2</sub> CO (37%) |

**Table S7:** ANOVA analysis of DoE settings. Significant model for GMGT-0/0'.**GMGT-0/0'**

Transform: Power

Constant: 0

| Source                    | Sum of Squares | df | Mean Square | F-value | p-value                   |
|---------------------------|----------------|----|-------------|---------|---------------------------|
| <b>Model</b>              | 0.7319         | 4  | 0.1830      | 3.69    | <b>0.0117</b> significant |
| A-NH <sub>4</sub> Cl      | 0.1631         | 1  | 0.1631      | 3.29    | 0.0770                    |
| B-H <sub>2</sub> CO (37%) | 0.0035         | 1  | 0.0035      | 0.0697  | 0.7931                    |
| C-CH <sub>3</sub> OH      | 0.1317         | 1  | 0.1317      | 2.66    | 0.1108                    |
| BC                        | 0.4229         | 1  | 0.4229      | 8.53    | <b>0.0057</b>             |
| <b>Residual</b>           | 2.03           | 41 | 0.0496      |         |                           |
| Lack of Fit               | 0.3604         | 10 | 0.0360      | 0.6681  | 0.7445 not significant    |
| Pure Error                | 1.67           | 31 | 0.0539      |         |                           |
| <b>Cor Total</b>          | 2.76           | 45 |             |         |                           |

**Fit Statistics**

|                  |        |                                |        |
|------------------|--------|--------------------------------|--------|
| <b>Std. Dev.</b> | 0.2226 | <b>R<sup>2</sup></b>           | 0.2647 |
| <b>Mean</b>      | 2.34   | <b>Adjusted R<sup>2</sup></b>  | 0.1930 |
| <b>C.V. %</b>    | 9.50   | <b>Predicted R<sup>2</sup></b> | 0.0608 |
|                  |        | <b>Adeq Precision</b>          | 7.0124 |

**Final Equation in Terms of Actual Factors**

$$\begin{aligned}
 (\text{GMGT } 0a/0a)^1 = & \\
 & +1.84499 \\
 & +0.017060 \text{ NH}_4\text{Cl} \\
 & +0.004308 \text{ H}_2\text{CO (37\%)} \\
 & +0.003194 \text{ CH}_3\text{OH}
 \end{aligned}$$

**Table S8:** ANOVA analysis of DoE settings. Significant model for glutamic acid (Glu).  
**Glu**

Transform: Inverse Sqrt

Constant: 0

| Source                     | Sum of Squares | df | Mean Square | F-value | p-value                   |
|----------------------------|----------------|----|-------------|---------|---------------------------|
| <b>Model</b>               | 0.0284         | 4  | 0.0071      | 3.64    | <b>0.0130</b> significant |
| B- H <sub>2</sub> CO (37%) | 0.0022         | 1  | 0.0022      | 1.14    | 0.2914                    |
| C-CH <sub>3</sub> OH       | 0.0035         | 1  | 0.0035      | 1.79    | 0.1891                    |
| BC                         | 0.0075         | 1  | 0.0075      | 3.83    | 0.0577                    |
| C <sup>2</sup>             | 0.0152         | 1  | 0.0152      | 7.78    | <b>0.0081</b>             |
| <b>Residual</b>            | 0.0761         | 39 | 0.0020      |         |                           |
| Lack of Fit                | 0.0174         | 10 | 0.0017      | 0.8597  | 0.5788 not significant    |
| Pure Error                 | 0.0587         | 29 | 0.0020      |         |                           |
| <b>Cor Total</b>           | 0.1044         | 43 |             |         |                           |

**Fit Statistics**

|                  |        |                                |        |
|------------------|--------|--------------------------------|--------|
| <b>Std. Dev.</b> | 0.0442 | <b>R<sup>2</sup></b>           | 0.2716 |
| <b>Mean</b>      | 0.1621 | <b>Adjusted R<sup>2</sup></b>  | 0.1969 |
| <b>C.V. %</b>    | 27.24  | <b>Predicted R<sup>2</sup></b> | 0.0794 |
|                  |        | <b>Adeq Precision</b>          | 5.9661 |

**Final Equation in Terms of Actual Factors**

$$\begin{aligned}
 1/\text{Sqrt}(\text{Glu}) = & \\
 & +0.201845 \\
 & -0.000676 \text{ H}_2\text{CO (37\%)} \\
 & +0.000571 \text{ CH}_3\text{OH} \\
 & +5.01076\text{E-}06 \text{ H}_2\text{CO (37\%)} * \text{CH}_3\text{OH} \\
 & -5.80794\text{E-}06 \text{ CH}_3\text{OH}^2
 \end{aligned}$$



**Table S9:** ANOVA analysis of DoE settings. Significant model for asparagine (Asn).

**Asn**

Transform: Square Root

Constant: 0

| Source                     | Sum of Squares | df | Mean Square | F-value | p-value                   |
|----------------------------|----------------|----|-------------|---------|---------------------------|
| <b>Model</b>               | 9.55           | 4  | 2.39        | 3.13    | <b>0.0253</b> significant |
| B- H <sub>2</sub> CO (37%) | 0.1416         | 1  | 0.1416      | 0.1854  | 0.6691                    |
| C-CH <sub>3</sub> OH       | 2.11           | 1  | 2.11        | 2.77    | 0.1041                    |
| BC                         | 3.01           | 1  | 3.01        | 3.94    | 0.0543                    |
| C <sup>2</sup>             | 4.41           | 1  | 4.41        | 5.78    | <b>0.0211</b>             |
| <b>Residual</b>            | 29.79          | 39 | 0.7638      |         |                           |
| Lack of Fit                | 6.54           | 10 | 0.6542      | 0.8162  | 0.6159 not significant    |
| Pure Error                 | 23.25          | 29 | 0.8016      |         |                           |
| <b>Cor Total</b>           | 39.34          | 43 |             |         |                           |

**Fit Statistics**

|                  |        |                                |        |
|------------------|--------|--------------------------------|--------|
| <b>Std. Dev.</b> | 0.8739 | <b>R<sup>2</sup></b>           | 0.2429 |
| <b>Mean</b>      | 1.68   | <b>Adjusted R<sup>2</sup></b>  | 0.1652 |
| <b>C.V. %</b>    | 51.92  | <b>Predicted R<sup>2</sup></b> | 0.0486 |
|                  |        | <b>Adeq Precision</b>          | 5.7417 |

**Final Equation in Terms of Actual Factors**

|                                                       |
|-------------------------------------------------------|
| Sqrt(Asn) =                                           |
| +0.821300                                             |
| +0.012061 H <sub>2</sub> CO (37%)                     |
| -0.006891 CH <sub>3</sub> OH                          |
| -0.000101 H <sub>2</sub> CO (37%)* CH <sub>3</sub> OH |
| +0.000099 CH <sub>3</sub> OH <sup>2</sup>             |

**Table S10:** ANOVA analysis of DoE settings. Significant model for serine (Ser).**Ser**

Transform: Base 10 Log

Constant: 0

| Source               | Sum of Squares | df | Mean Square | F-value | p-value                   |
|----------------------|----------------|----|-------------|---------|---------------------------|
| <b>Model</b>         | 1.18           | 2  | 0.5878      | 4.30    | <b>0.0201</b> significant |
| C-CH <sub>3</sub> OH | 0.2472         | 1  | 0.2472      | 1.81    | 0.1860                    |
| C <sup>2</sup>       | 0.9306         | 1  | 0.9306      | 6.81    | <b>0.0126</b>             |
| <b>Residual</b>      | 5.60           | 41 | 0.1366      |         |                           |
| Lack of Fit          | 1.80           | 12 | 0.1496      | 1.14    | 0.3685 not significant    |
| Pure Error           | 3.81           | 29 | 0.1313      |         |                           |
| <b>Cor Total</b>     | 6.78           | 43 |             |         |                           |

**Fit Statistics**

|                  |        |                                |        |
|------------------|--------|--------------------------------|--------|
| <b>Std. Dev.</b> | 0.3696 | <b>R<sup>2</sup></b>           | 0.1734 |
| <b>Mean</b>      | 0.3264 | <b>Adjusted R<sup>2</sup></b>  | 0.1331 |
| <b>C.V. %</b>    | 113.24 | <b>Predicted R<sup>2</sup></b> | 0.0627 |
|                  |        | <b>Adeq Precision</b>          | 6.1706 |

**Final Equation in Terms of Actual Factors**

|                                           |
|-------------------------------------------|
| Log <sub>10</sub> (Ser) =                 |
| +0.585712                                 |
| -0.008698 CH <sub>3</sub> OH              |
| +0.000045 CH <sub>3</sub> OH <sup>2</sup> |

**Table S11:** ANOVA analysis of DoE settings. Significant model for glycine (Gly).**Gly**

Transform: Base 10 Log

Constant: 0

| Source                                  | Sum of Squares | df | Mean Square | F-value | p-value                   |
|-----------------------------------------|----------------|----|-------------|---------|---------------------------|
| <b>Model</b>                            | 1.24           | 4  | 0.3101      | 2.94    | <b>0.0325</b> significant |
| B- H <sub>2</sub> CO (37%) <sup>2</sup> | 0.0286         | 1  | 0.0286      | 0.2706  | 0.6059                    |
| C-CH <sub>3</sub> OH                    | 0.2754         | 1  | 0.2754      | 2.61    | 0.1144                    |
| BC                                      | 0.3612         | 1  | 0.3612      | 3.42    | 0.0720                    |
| C <sup>2</sup>                          | 0.5880         | 1  | 0.5880      | 5.57    | <b>0.0234</b>             |
| <b>Residual</b>                         | 4.12           | 39 | 0.1056      |         |                           |
| Lack of Fit                             | 0.9094         | 10 | 0.0909      | 0.8219  | 0.6109 not significant    |
| Pure Error                              | 3.21           | 29 | 0.1106      |         |                           |
| <b>Cor Total</b>                        | 5.36           | 43 |             |         |                           |

**Fit Statistics**

|                  |        |                                |        |
|------------------|--------|--------------------------------|--------|
| <b>Std. Dev.</b> | 0.3250 | <b>R<sup>2</sup></b>           | 0.2315 |
| <b>Mean</b>      | 1.56   | <b>Adjusted R<sup>2</sup></b>  | 0.1527 |
| <b>C.V. %</b>    | 20.78  | <b>Predicted R<sup>2</sup></b> | 0.0245 |
|                  |        | <b>Adeq Precision</b>          | 5.5980 |

**Final Equation in Terms of Actual Factors**

|                                                       |
|-------------------------------------------------------|
| Log <sub>10</sub> (Gly) =                             |
| +1.26420                                              |
| +0.004282 H <sub>2</sub> CO (37%)                     |
| -0.002735 CH <sub>3</sub> OH                          |
| -0.000035 H <sub>2</sub> CO (37%)* CH <sub>3</sub> OH |
| +0.000036 CH <sub>3</sub> OH <sup>2</sup>             |

**Table S12:** ANOVA analysis of DoE settings. Significant model for alanine (Ala).**Ala**

Transform: Base 10 Log

Constant: 0

| Source                     | Sum of Squares | df | Mean Square | F-value | p-value                   |
|----------------------------|----------------|----|-------------|---------|---------------------------|
| <b>Model</b>               | 0.8137         | 4  | 0.2034      | 2.77    | <b>0.0408</b> significant |
| B- H <sub>2</sub> CO (37%) | 0.0095         | 1  | 0.0095      | 0.1295  | 0.7209                    |
| C-CH <sub>3</sub> OH       | 0.1778         | 1  | 0.1778      | 2.42    | 0.1281                    |
| BC                         | 0.2269         | 1  | 0.2269      | 3.08    | 0.0869                    |
| C <sup>2</sup>             | 0.4099         | 1  | 0.4099      | 5.57    | <b>0.0233</b>             |
| <b>Residual</b>            | 2.87           | 39 | 0.0736      |         |                           |
| Lack of Fit                | 0.7646         | 10 | 0.0765      | 1.05    | 0.4266 not significant    |
| Pure Error                 | 2.10           | 29 | 0.0726      |         |                           |
| <b>Cor Total</b>           | 3.68           | 43 |             |         |                           |

**Fit Statistics**

|                  |        |                                |        |
|------------------|--------|--------------------------------|--------|
| <b>Std. Dev.</b> | 0.2712 | <b>R<sup>2</sup></b>           | 0.2210 |
| <b>Mean</b>      | 1.23   | <b>Adjusted R<sup>2</sup></b>  | 0.1411 |
| <b>C.V. %</b>    | 22.08  | <b>Predicted R<sup>2</sup></b> | 0.0077 |
|                  |        | <b>Adeq Precision</b>          | 5.3901 |

**Final Equation in Terms of Actual Factors**

|                                                       |
|-------------------------------------------------------|
| Log <sub>10</sub> (Ala) =                             |
| +1.01307                                              |
| +0.003298 H <sub>2</sub> CO (37%)                     |
| -0.002490 CH <sub>3</sub> OH                          |
| -0.000028 H <sub>2</sub> CO (37%)* CH <sub>3</sub> OH |
| +0.000030 CH <sub>3</sub> OH <sup>2</sup>             |

**Table S13:** ANOVA analysis of DoE settings. Significant model for tyrosine (Tyr).**Tyr**

Transform: Square Root

Constant: 0

| Source                     | Sum of Squares | df | Mean Square | F-value | p-value                   |
|----------------------------|----------------|----|-------------|---------|---------------------------|
| <b>Model</b>               | 14.35          | 4  | 3.59        | 3.55    | <b>0.0146</b> significant |
| B- H <sub>2</sub> CO (37%) | 0.2950         | 1  | 0.2950      | 0.2917  | 0.5922                    |
| C-CH <sub>3</sub> OH       | 1.41           | 1  | 1.41        | 1.40    | 0.2444                    |
| BC                         | 3.77           | 1  | 3.77        | 3.73    | 0.0609                    |
| C <sup>2</sup>             | 8.96           | 1  | 8.96        | 8.86    | <b>0.0050</b>             |
| <b>Residual</b>            | 39.44          | 39 | 1.01        |         |                           |
| Lack of Fit                | 12.51          | 10 | 1.25        | 1.35    | 0.2534 not significant    |
| Pure Error                 | 26.94          | 29 | 0.9288      |         |                           |
| <b>Cor Total</b>           | 53.80          | 43 |             |         |                           |

**Fit Statistics**

|                  |       |                                |        |
|------------------|-------|--------------------------------|--------|
| <b>Std. Dev.</b> | 1.01  | <b>R<sup>2</sup></b>           | 0.2668 |
| <b>Mean</b>      | 1.68  | <b>Adjusted R<sup>2</sup></b>  | 0.1916 |
| <b>C.V. %</b>    | 59.76 | <b>Predicted R<sup>2</sup></b> | 0.0658 |
|                  |       | <b>Adeq Precision</b>          | 5.6803 |

**Final Equation in Terms of Actual Factors**

|                                                       |
|-------------------------------------------------------|
| Sqrt(Tyr) =                                           |
| +1.07569                                              |
| +0.013822 H <sub>2</sub> CO (37%)                     |
| -0.015538 CH <sub>3</sub> OH                          |
| -0.000113 H <sub>2</sub> CO (37%)* CH <sub>3</sub> OH |
| +0.000141 CH <sub>3</sub> OH <sup>2</sup>             |

**Table S14:** ANOVA analysis of DoE settings. Significant model for tryptophan (Trp).**Trp**

Transform: Base 10 Log

Constant: 0

| Source                     | Sum of Squares | df | Mean Square | F-value | p-value                   |
|----------------------------|----------------|----|-------------|---------|---------------------------|
| <b>Model</b>               | 1.40           | 4  | 0.3488      | 3.33    | <b>0.0194</b> significant |
| B- H <sub>2</sub> CO (37%) | 0.0360         | 1  | 0.0360      | 0.3430  | 0.5615                    |
| C-CH <sub>3</sub> OH       | 0.2690         | 1  | 0.2690      | 2.57    | 0.1172                    |
| BC                         | 0.4041         | 1  | 0.4041      | 3.86    | 0.0568                    |
| C <sup>2</sup>             | 0.6985         | 1  | 0.6985      | 6.66    | <b>0.0137</b>             |
| <b>Residual</b>            | 4.09           | 39 | 0.1048      |         |                           |
| Lack of Fit                | 0.8849         | 10 | 0.0885      | 0.8012  | 0.6287 not significant    |
| Pure Error                 | 3.20           | 29 | 0.1104      |         |                           |
| <b>Cor Total</b>           | 5.48           | 43 |             |         |                           |

**Fit Statistics**

|                  |        |                                |        |
|------------------|--------|--------------------------------|--------|
| <b>Std. Dev.</b> | 0.3237 | <b>R<sup>2</sup></b>           | 0.2545 |
| <b>Mean</b>      | 0.0349 | <b>Adjusted R<sup>2</sup></b>  | 0.1780 |
| <b>C.V. %</b>    | 927.81 | <b>Predicted R<sup>2</sup></b> | 0.0588 |
|                  |        | <b>Adeq Precision</b>          | 5.8875 |

**Final Equation in Terms of Actual Factors**

|                                                       |
|-------------------------------------------------------|
| Log <sub>10</sub> (Trp) =                             |
| -0.264752                                             |
| +0.004557 H <sub>2</sub> CO (37%)                     |
| -0.003246 CH <sub>3</sub> OH                          |
| -0.000037 H <sub>2</sub> CO (37%)* CH <sub>3</sub> OH |
| +0.000039 CH <sub>3</sub> OH <sup>2</sup>             |

**Table S15:** ANOVA analysis of DoE settings. Significant model for phenylalanine (Phe).**Phe**

Transform: Base 10 Log

Constant: 0

| Source               | Sum of Squares | df | Mean Square | F-value | p-value                   |
|----------------------|----------------|----|-------------|---------|---------------------------|
| <b>Model</b>         | 0.7950         | 2  | 0.3975      | 3.72    | <b>0.0327</b> significant |
| C-CH <sub>3</sub> OH | 0.2231         | 1  | 0.2231      | 2.09    | 0.1560                    |
| C <sup>2</sup>       | 0.5737         | 1  | 0.5737      | 5.37    | <b>0.0255</b>             |
| <b>Residual</b>      | 4.38           | 41 | 0.1068      |         |                           |
| Lack of Fit          | 1.29           | 12 | 0.1078      | 1.01    | 0.4627 not significant    |
| Pure Error           | 3.09           | 29 | 0.1064      |         |                           |
| <b>Cor Total</b>     | 5.17           | 43 |             |         |                           |

**Fit Statistics**

|                  |        |                                |        |
|------------------|--------|--------------------------------|--------|
| <b>Std. Dev.</b> | 0.3268 | <b>R<sup>2</sup></b>           | 0.1536 |
| <b>Mean</b>      | 0.8346 | <b>Adjusted R<sup>2</sup></b>  | 0.1124 |
| <b>C.V. %</b>    | 39.16  | <b>Predicted R<sup>2</sup></b> | 0.0463 |
|                  |        | <b>Adeq Precision</b>          | 5.7348 |

**Final Equation in Terms of Actual Factors**

|                                           |
|-------------------------------------------|
| Log <sub>10</sub> (Phe) =                 |
| +1.01473                                  |
| -0.006613 CH <sub>3</sub> OH              |
| +0.000036 CH <sub>3</sub> OH <sup>2</sup> |

**Table S16:** ANOVA analysis of DoE settings. Significant model for total amino acids.**Total Amino acids**

Transform: Base 10 Log

Constant: 0

| Source                     | Sum of Squares | df | Mean Square | F-value | p-value                   |
|----------------------------|----------------|----|-------------|---------|---------------------------|
| <b>Model</b>               | 1.01           | 4  | 0.2532      | 3.18    | <b>0.0236</b> significant |
| B- H <sub>2</sub> CO (37%) | 0.0344         | 1  | 0.0344      | 0.4325  | 0.5146                    |
| C-CH <sub>3</sub> OH       | 0.2325         | 1  | 0.2325      | 2.92    | 0.0954                    |
| BC                         | 0.2675         | 1  | 0.2675      | 3.36    | 0.0745                    |
| C <sup>2</sup>             | 0.4862         | 1  | 0.4862      | 6.11    | <b>0.0180</b>             |
| <b>Residual</b>            | 3.11           | 39 | 0.0796      |         |                           |
| Lack of Fit                | 0.8048         | 10 | 0.0805      | 1.01    | 0.4553 not significant    |
| Pure Error                 | 2.30           | 29 | 0.0793      |         |                           |
| <b>Cor Total</b>           | 4.12           | 43 |             |         |                           |

**Fit Statistics**

|                  |        |                                |        |
|------------------|--------|--------------------------------|--------|
| <b>Std. Dev.</b> | 0.2822 | <b>R<sup>2</sup></b>           | 0.2459 |
| <b>Mean</b>      | 2.24   | <b>Adjusted R<sup>2</sup></b>  | 0.1686 |
| <b>C.V. %</b>    | 12.61  | <b>Predicted R<sup>2</sup></b> | 0.0367 |
|                  |        | <b>Adeq Precision</b>          | 5.8731 |

**Final Equation in Terms of Actual Factors**

$$\begin{aligned} \text{Log}_{10}(\text{Total Amino acids}) = & \\ & +1.97501 \\ & +0.003791 \text{ H}_2\text{CO (37\%)} \\ & -0.002661 \text{ CH}_3\text{OH} \\ & -0.000030 \text{ H}_2\text{CO (37\%)* CH}_3\text{OH} \\ & +0.000033 \text{ CH}_3\text{OH}^2 \end{aligned}$$



**Table S17:** ANOVA analysis of DoE settings. Significant model for glutamine (Gln).**Gln**

Transform: Square Root

Constant: 0

| Source                | Sum of Squares | df | Mean Square | F-value | p-value                   |
|-----------------------|----------------|----|-------------|---------|---------------------------|
| <b>Model</b>          | 4.36           | 2  | 2.18        | 4.57    | <b>0.0162</b> significant |
| A-NH <sub>4</sub> Cl  | 2.85           | 1  | 2.85        | 5.96    | <b>0.0190</b>             |
| C- CH <sub>3</sub> OH | 1.62           | 1  | 1.62        | 3.39    | 0.0727                    |
| <b>Residual</b>       | 19.57          | 41 | 0.4772      |         |                           |
| Lack of Fit           | 4.09           | 12 | 0.3411      | 0.6393  | 0.7916 not significant    |
| Pure Error            | 15.47          | 29 | 0.5336      |         |                           |
| <b>Cor Total</b>      | 23.92          | 43 |             |         |                           |

**Fit Statistics**

|                  |        |                                |        |
|------------------|--------|--------------------------------|--------|
| <b>Std. Dev.</b> | 0.6908 | <b>R<sup>2</sup></b>           | 0.1822 |
| <b>Mean</b>      | 1.51   | <b>Adjusted R<sup>2</sup></b>  | 0.1423 |
| <b>C.V. %</b>    | 45.66  | <b>Predicted R<sup>2</sup></b> | 0.0593 |
|                  |        | <b>Adeq Precision</b>          | 5.1932 |

**Final Equation in Terms of Actual Factors**

|                              |
|------------------------------|
| Sqrt(Gln) =                  |
| +2.42325                     |
| -0.071202 NH <sub>4</sub> Cl |
| -0.003356 CH <sub>3</sub> OH |

**Table S18:** ANOVA analysis of DoE settings. Significant model for arginine (Arg).**Arg**

Transform: Square Root

Constant: 0

| Source               | Sum of Squares | df | Mean Square | F-value | p-value                   |
|----------------------|----------------|----|-------------|---------|---------------------------|
| <b>Model</b>         | 1.71           | 1  | 1.71        | 5.75    | <b>0.0210</b> significant |
| A-NH <sub>4</sub> Cl | 1.71           | 1  | 1.71        | 5.75    | <b>0.0210</b>             |
| <b>Residual</b>      | 12.50          | 42 | 0.2976      |         |                           |
| Lack of Fit          | 3.18           | 13 | 0.2450      | 0.7628  | 0.6900 not significant    |
| Pure Error           | 9.31           | 29 | 0.3212      |         |                           |
| <b>Cor Total</b>     | 14.21          | 43 |             |         |                           |

**Fit Statistics**

|                  |        |                                |        |
|------------------|--------|--------------------------------|--------|
| <b>Std. Dev.</b> | 0.5455 | <b>R<sup>2</sup></b>           | 0.1205 |
| <b>Mean</b>      | 0.7682 | <b>Adjusted R<sup>2</sup></b>  | 0.0995 |
| <b>C.V. %</b>    | 71.01  | <b>Predicted R<sup>2</sup></b> | 0.0432 |
|                  |        | <b>Adeq Precision</b>          | 5.9867 |

**Final Equation in Terms of Actual Factors**

|                              |
|------------------------------|
| Sqrt(Arg) =                  |
| +0.345122                    |
| +0.055201 NH <sub>4</sub> Cl |

**Table S19:** ANOVA analysis of DoE settings. Significant model for valine (Val).

**Val**

Transform: Inverse Sqrt

Constant: 0

| Source               | Sum of Squares | df | Mean Square | F-value | p-value                   |
|----------------------|----------------|----|-------------|---------|---------------------------|
| <b>Model</b>         | 0.0563         | 1  | 0.0563      | 5.68    | <b>0.0217</b> significant |
| A-NH <sub>4</sub> Cl | 0.0563         | 1  | 0.0563      | 5.68    | <b>0.0217</b>             |
| <b>Residual</b>      | 0.4159         | 42 | 0.0099      |         |                           |
| Lack of Fit          | 0.1203         | 13 | 0.0093      | 0.9076  | 0.5561 not significant    |
| Pure Error           | 0.2956         | 29 | 0.0102      |         |                           |
| <b>Cor Total</b>     | 0.4722         | 43 |             |         |                           |

**Fit Statistics**

|                  |        |                                |        |
|------------------|--------|--------------------------------|--------|
| <b>Std. Dev.</b> | 0.0995 | <b>R<sup>2</sup></b>           | 0.1191 |
| <b>Mean</b>      | 0.3033 | <b>Adjusted R<sup>2</sup></b>  | 0.0982 |
| <b>C.V. %</b>    | 32.81  | <b>Predicted R<sup>2</sup></b> | 0.0393 |
|                  |        | <b>Adeq Precision</b>          | 5.9494 |

**Final Equation in Terms of Actual Factors**

|                              |
|------------------------------|
| 1/Sqrt(Val) =                |
| +0.380002                    |
| -0.010007 NH <sub>4</sub> Cl |

**Table S20:** ANOVA analysis of DoE settings. Significant model for isoleucine (Ile).**Ile**

Transform: Base 10 Log

Constant: 0

| Source                     | Sum of Squares | df | Mean Square | F-value | p-value                   |
|----------------------------|----------------|----|-------------|---------|---------------------------|
| <b>Model</b>               | 1.37           | 5  | 0.2741      | 3.13    | <b>0.0183</b> significant |
| A-NH <sub>4</sub> Cl       | 0.4420         | 1  | 0.4420      | 5.05    | <b>0.0305</b>             |
| B- H <sub>2</sub> CO (37%) | 0.0020         | 1  | 0.0020      | 0.0224  | 0.8819                    |
| C- CH <sub>3</sub> OH      | 0.2655         | 1  | 0.2655      | 3.04    | 0.0895                    |
| BC                         | 0.3051         | 1  | 0.3051      | 3.49    | 0.0695                    |
| C <sup>2</sup>             | 0.4161         | 1  | 0.4161      | 4.76    | <b>0.0354</b>             |
| <b>Residual</b>            | 3.32           | 38 | 0.0875      |         |                           |
| Lack of Fit                | 0.6451         | 9  | 0.0717      | 0.7760  | 0.6394 not significant    |
| Pure Error                 | 2.68           | 29 | 0.0924      |         |                           |
| <b>Cor Total</b>           | 4.69           | 43 |             |         |                           |

**Fit Statistics**

|                  |        |                                |        |
|------------------|--------|--------------------------------|--------|
| <b>Std. Dev.</b> | 0.2958 | <b>R<sup>2</sup></b>           | 0.2919 |
| <b>Mean</b>      | 1.08   | <b>Adjusted R<sup>2</sup></b>  | 0.1988 |
| <b>C.V. %</b>    | 27.38  | <b>Predicted R<sup>2</sup></b> | 0.0449 |
|                  |        | <b>Adeq Precision</b>          | 5.9240 |

**Final Equation in Terms of Actual Factors**

|                                                       |
|-------------------------------------------------------|
| Log <sub>10</sub> (Ile) =                             |
| +0.587403                                             |
| +0.028086 NH <sub>4</sub> Cl                          |
| +0.003644 H <sub>2</sub> CO (37%)                     |
| -0.001805 CH <sub>3</sub> OH                          |
| -0.000032 H <sub>2</sub> CO (37%)* CH <sub>3</sub> OH |
| +0.000030 CH <sub>3</sub> OH <sup>2</sup>             |

**Table S21:** ANOVA analysis of DoE settings. Significant model for leucine (Leu).**Leu**

Transform: Base 10 Log

Constant: 0

| Source                     | Sum of Squares | df | Mean Square | F-value | p-value                   |
|----------------------------|----------------|----|-------------|---------|---------------------------|
| <b>Model</b>               | 1.35           | 5  | 0.2700      | 3.04    | <b>0.0210</b> significant |
| A-NH <sub>4</sub> Cl       | 0.3884         | 1  | 0.3884      | 4.37    | <b>0.0432</b>             |
| B- H <sub>2</sub> CO (37%) | 0.0024         | 1  | 0.0024      | 0.0273  | 0.8696                    |
| C- CH <sub>3</sub> OH      | 0.2784         | 1  | 0.2784      | 3.13    | 0.0847                    |
| BC                         | 0.3009         | 1  | 0.3009      | 3.39    | 0.0735                    |
| C <sup>2</sup>             | 0.4380         | 1  | 0.4380      | 4.93    | <b>0.0324</b>             |
| <b>Residual</b>            | 3.37           | 38 | 0.0888      |         |                           |
| Lack of Fit                | 0.6405         | 9  | 0.0712      | 0.7547  | 0.6573 not significant    |
| Pure Error                 | 2.73           | 29 | 0.0943      |         |                           |
| <b>Cor Total</b>           | 4.73           | 43 |             |         |                           |

**Fit Statistics**

|                  |        |                                |        |
|------------------|--------|--------------------------------|--------|
| <b>Std. Dev.</b> | 0.2980 | <b>R<sup>2</sup></b>           | 0.2857 |
| <b>Mean</b>      | 1.02   | <b>Adjusted R<sup>2</sup></b>  | 0.1918 |
| <b>C.V. %</b>    | 29.23  | <b>Predicted R<sup>2</sup></b> | 0.0391 |
|                  |        | <b>Adeq Precision</b>          | 5.9139 |

**Final Equation in Terms of Actual Factors**

|                                                       |
|-------------------------------------------------------|
| Log <sub>10</sub> (Leu) =                             |
| +0.544955                                             |
| +0.026329 NH <sub>4</sub> Cl                          |
| +0.003633 H <sub>2</sub> CO (37%)                     |
| -0.001971 CH <sub>3</sub> OH                          |
| -0.000032 H <sub>2</sub> CO (37%)* CH <sub>3</sub> OH |
| +0.000031 CH <sub>3</sub> OH <sup>2</sup>             |

**Table S22:** ANOVA analysis of DoE settings. Significant model for threonine (Thr).**Thr**

Transform: Square Root

Constant: 0

| Source                     | Sum of Squares | df | Mean Square | F-value | p-value                   |
|----------------------------|----------------|----|-------------|---------|---------------------------|
| <b>Model</b>               | 6.73           | 4  | 1.68        | 3.21    | <b>0.0227</b> significant |
| B- H <sub>2</sub> CO (37%) | 0.7547         | 1  | 0.7547      | 1.44    | 0.2373                    |
| C- CH <sub>3</sub> OH      | 1.14           | 1  | 1.14        | 2.18    | 0.1478                    |
| BC                         | 2.25           | 1  | 2.25        | 4.29    | <b>0.0450</b>             |
| C <sup>2</sup>             | 2.57           | 1  | 2.57        | 4.90    | <b>0.0328</b>             |
| <b>Residual</b>            | 20.44          | 39 | 0.5240      |         |                           |
| Lack of Fit                | 5.39           | 10 | 0.5389      | 1.04    | 0.4376 not significant    |
| Pure Error                 | 15.05          | 29 | 0.5189      |         |                           |
| <b>Cor Total</b>           | 27.17          | 43 |             |         |                           |

**Fit Statistics**

|                  |        |                                |        |
|------------------|--------|--------------------------------|--------|
| <b>Std. Dev.</b> | 0.7239 | <b>R<sup>2</sup></b>           | 0.2477 |
| <b>Mean</b>      | 1.56   | <b>Adjusted R<sup>2</sup></b>  | 0.1705 |
| <b>C.V. %</b>    | 46.39  | <b>Predicted R<sup>2</sup></b> | 0.0220 |
|                  |        | <b>Adeq Precision</b>          | 5.7448 |

**Final Equation in Terms of Actual Factors**

|                                                       |
|-------------------------------------------------------|
| Sqrt(Thr) =                                           |
| +0.620539                                             |
| +0.011860 H <sub>2</sub> CO (37%)                     |
| -0.004232 CH <sub>3</sub> OH                          |
| -0.000087 H <sub>2</sub> CO (37%)* CH <sub>3</sub> OH |
| +0.000076 CH <sub>3</sub> OH <sup>2</sup>             |

**Table S23:** ANOVA analysis of DoE settings. Significant model for aspartic acid (Asp).**Asp**

Transform: Inverse

| Source                | Sum of Squares | df | Mean Square | F-value | p-value                   |
|-----------------------|----------------|----|-------------|---------|---------------------------|
| <b>Model</b>          | 0.0117         | 2  | 0.0058      | 3.45    | <b>0.0411</b> significant |
| C- CH <sub>3</sub> OH | 0.0052         | 1  | 0.0052      | 3.06    | 0.0878                    |
| C <sup>2</sup>        | 0.0065         | 1  | 0.0065      | 3.86    | 0.0561                    |
| <b>Residual</b>       | 0.0693         | 41 | 0.0017      |         |                           |
| Lack of Fit           | 0.0200         | 12 | 0.0017      | 0.9778  | 0.4912 not significant    |
| Pure Error            | 0.0493         | 29 | 0.0017      |         |                           |
| <b>Cor Total</b>      | 0.0809         | 43 |             |         |                           |

**Fit Statistics**

|                  |        |                                |        |
|------------------|--------|--------------------------------|--------|
| <b>Std. Dev.</b> | 0.0411 | <b>R<sup>2</sup></b>           | 0.1441 |
| <b>Mean</b>      | 0.1058 | <b>Adjusted R<sup>2</sup></b>  | 0.1024 |
| <b>C.V. %</b>    | 38.87  | <b>Predicted R<sup>2</sup></b> | 0.0280 |
|                  |        | <b>Adeq Precision</b>          | 5.3969 |

**Final Equation in Terms of Actual Factors**

|                                              |   |
|----------------------------------------------|---|
| 1/(Asp)                                      | = |
| +0.092712                                    |   |
| +0.000649 CH <sub>3</sub> OH                 |   |
| -3.81072E-06 CH <sub>3</sub> OH <sup>2</sup> |   |

**Table S24.** Levene-tests (modified robust Brown-Forsythe Levene-type test based on the absolute deviations from the median) of lipid and amino acid production in the extreme values setting (non-significant result if p-value > 0.05, marked in bold). Abbreviations of amino acids: Asp = aspartic acid; Glu = glutamic acid; Asn = asparagine; Ser = serine; Gln = glutamine; His = histidine; Gly = glycine; Thr = threonine; Arg = arginine; Ala = alanine; Tyr = tyrosine; Val = valine; Met = methionine; Trp = tryptophan; Phe = phenylalanine; Ile = isoleucine; Leu = leucine.

| Lipids               |               | Amino Acids |                |
|----------------------|---------------|-------------|----------------|
| ratio                | p-value       | species     | p-value        |
| Archaeol/macrocyclc  | 4.72e-07      | Asp         | <b>0.07071</b> |
| Diethers/tetraethers | <b>0.486</b>  | Glu         | 0.001651       |
| GDGT/GMGT            | <b>0.2931</b> | Asn         | 2.315e-05      |
| GTGT/GDGT            | <b>0.1927</b> | Ser         | 0.0111         |
| GTGT/GMGT            | 0.03613       | Gln         | 0.04085        |
| GMGT-0/0'            | 0.001651      | His         | n.a.           |
|                      |               | Gly         | 0.007693       |
|                      |               | Thr         | 0.01707        |
|                      |               | Arg         | 0.0004998      |
|                      |               | Ala         | 0.0007432      |
|                      |               | Tyr         | 0.0118         |
|                      |               | Val         | 0.005982       |
|                      |               | Met         | 2.173e-05      |
|                      |               | Trp         | 0.03481        |
|                      |               | Phe         | 0.01328        |
|                      |               | Ile         | 0.0002112      |
|                      |               | Leu         | 0.002336       |
|                      |               | total       | 0.008958       |



**Table S25.** ANOVA analysis of lipid and amino acid species that showed no significance at the performed Levene test (see Table S26, significant if  $Pr(>F) < 0.01$ ). Asp = aspartic acid.

**Analysis for Diethers/tetraethers**

|                         | Df | Sum Sq | Mean Sq | F value | Pr (>F)          |
|-------------------------|----|--------|---------|---------|------------------|
| <b>NH<sub>4</sub>Cl</b> | 1  | 0.112  | 0.112   | 0.0450  | 0.8354766        |
| <b>H<sub>2</sub>CO</b>  | 1  | 69.295 | 69.295  | 27.8926 | <b>0.0001942</b> |
| <b>CH<sub>3</sub>OH</b> | 1  | 0.029  | 0.029   | 0.0119  | 0.9150552        |
| <b>Residuals</b>        | 12 | 29.812 | 2.484   |         |                  |

**Analysis for GDGT/GMGT**

|                         | Df | Sum Sq | Mean Sq | F value | Pr (>F)          |
|-------------------------|----|--------|---------|---------|------------------|
| <b>NH<sub>4</sub>Cl</b> | 1  | 0.4919 | 0.4919  | 4.1580  | 0.06409          |
| <b>H<sub>2</sub>CO</b>  | 1  | 7.7360 | 7.7360  | 65.3901 | <b>3.368e-06</b> |
| <b>CH<sub>3</sub>OH</b> | 1  | 0.1326 | 0.1326  | 1.1209  | 0.31058          |
| <b>Residuals</b>        | 12 | 1.4197 | 0.1183  |         |                  |

**Analysis for GTGT-0/GDGT-0**

|                         | Df | Sum Sq   | Mean Sq  | F value | Pr (>F)         |
|-------------------------|----|----------|----------|---------|-----------------|
| <b>NH<sub>4</sub>Cl</b> | 1  | 0.002138 | 0.002138 | 3.4467  | 0.08809         |
| <b>H<sub>2</sub>CO</b>  | 1  | 0.046884 | 0.046884 | 75.5676 | <b>1.59e-06</b> |
| <b>CH<sub>3</sub>OH</b> | 1  | 0.000003 | 0.000003 | 0.0040  | 0.95034         |
| <b>Residuals</b>        | 12 | 0.007445 | 0.000620 |         |                 |

**Analysis for Asp**

|                         | Df | Sum Sq  | Mean Sq | F value | Pr (>F)         |
|-------------------------|----|---------|---------|---------|-----------------|
| <b>NH<sub>4</sub>Cl</b> | 1  | 197.030 | 197.030 | 11.0624 | <b>0.006043</b> |
| <b>H<sub>2</sub>CO</b>  | 1  | 5.556   | 5.556   | 0.3119  | 0.586766        |
| <b>CH<sub>3</sub>OH</b> | 1  | 22.739  | 22.739  | 1.2767  | 0.280599        |
| <b>Residuals</b>        | 12 | 213.730 | 17.811  |         |                 |

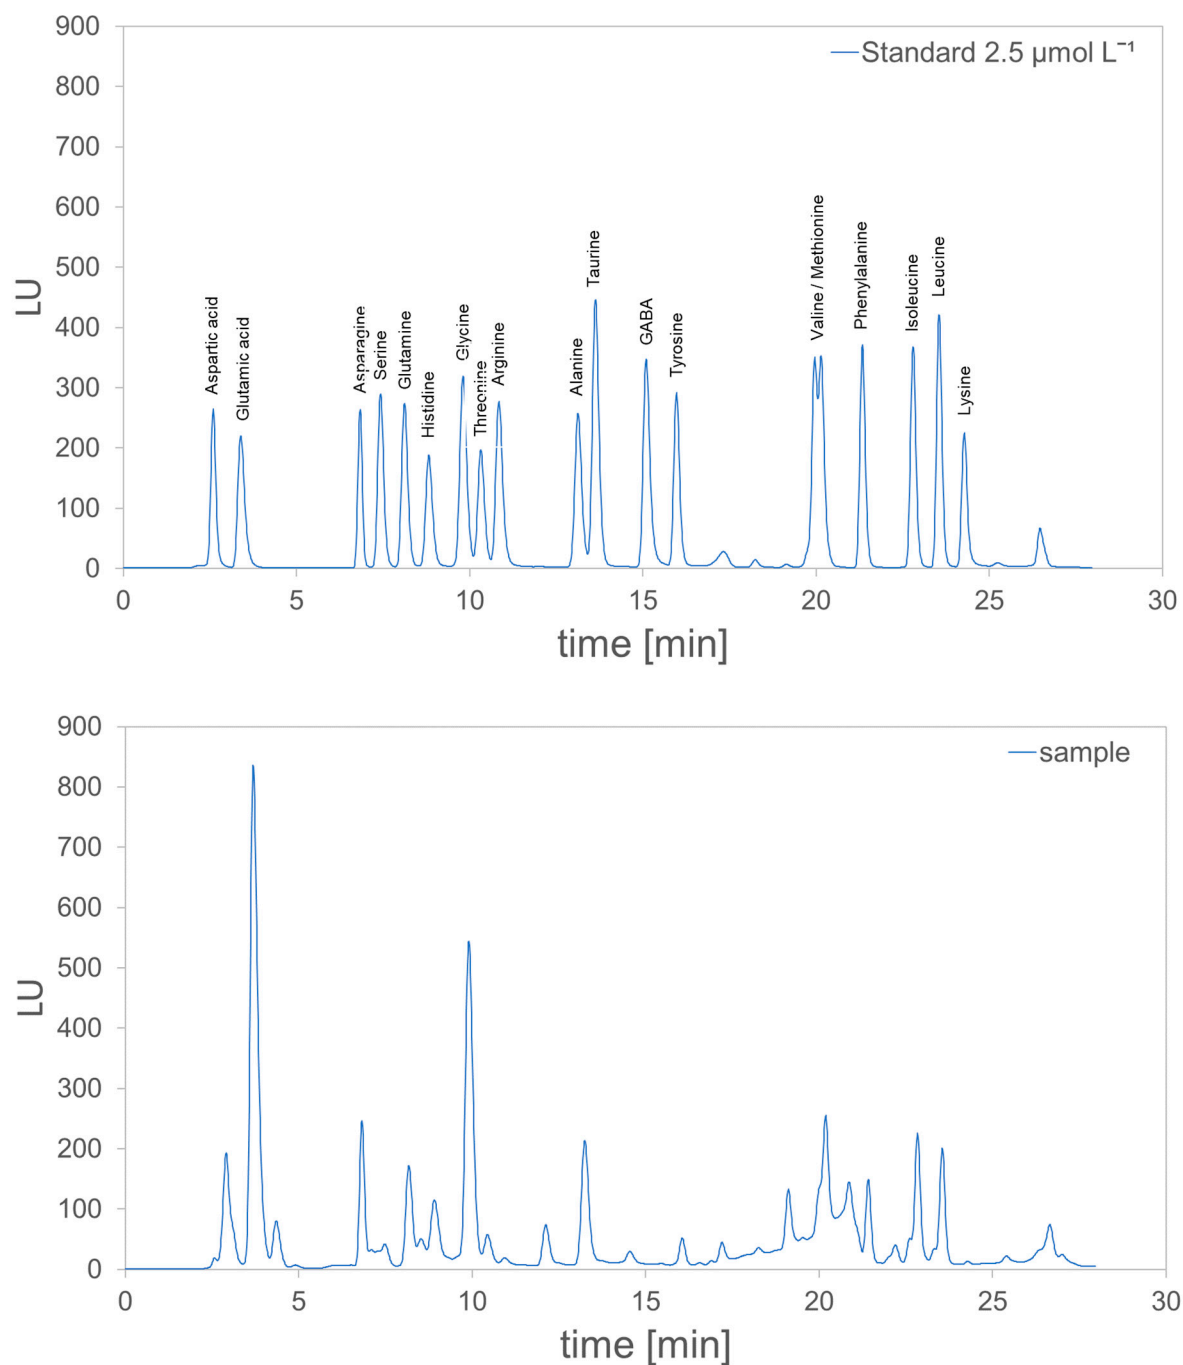

**Figure S1.** HPLC-Chromatograms of a 2.5  $\mu\text{mol L}^{-1}$  standard (AAS18, Sigma Aldrich; the single amino acid tryptophane (Trp) is missing in that specific standard curve) in MQ-water compared with a sample (undiluted) analysed by the method published in Clifford *et al.*, 2017 [53]. Injection volume 500  $\mu\text{L}$ , gain factor 10, method duration 28 min.

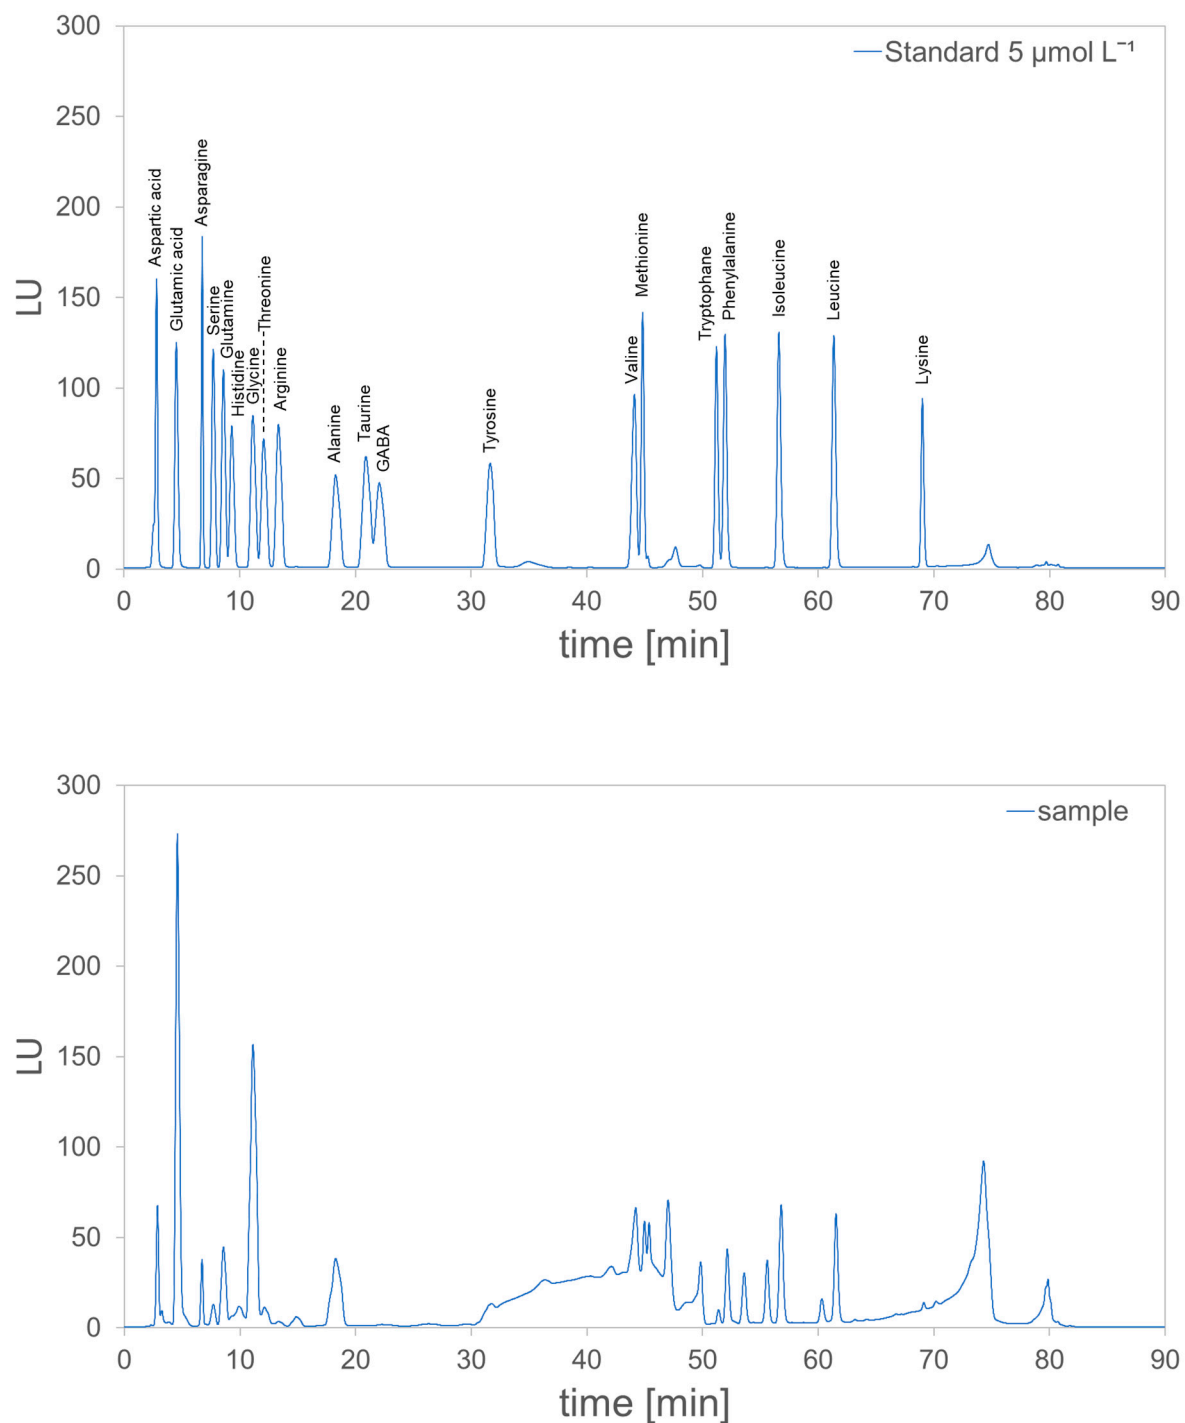

**Figure S2.** HPLC-Chromatograms of a 5 µmol L<sup>-1</sup> standard (AAS18, Sigma Aldrich) in MQ-water compared with a sample (dilution 1:4, in MQ-water) analysed by the new method presented in this study. Injection volume 100 µL, gain factor 10, method duration 90 min.

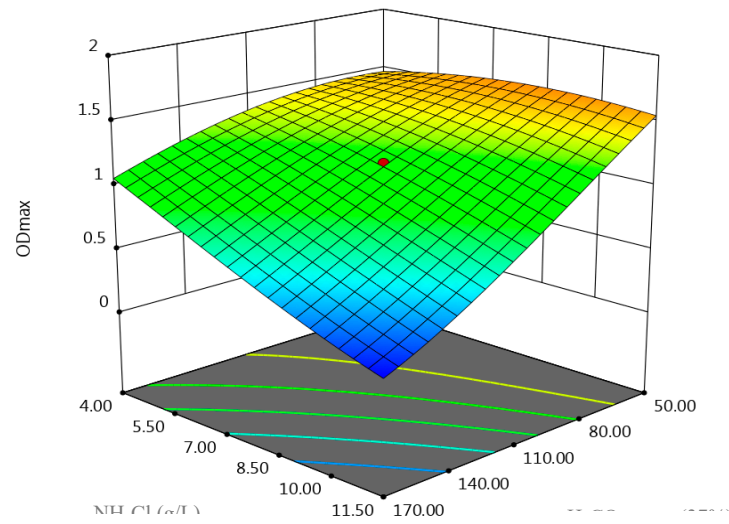

**Figure S3.** Results of the statistical analysis of the DoE. Significant dependences were calculated for OD<sub>max</sub>.

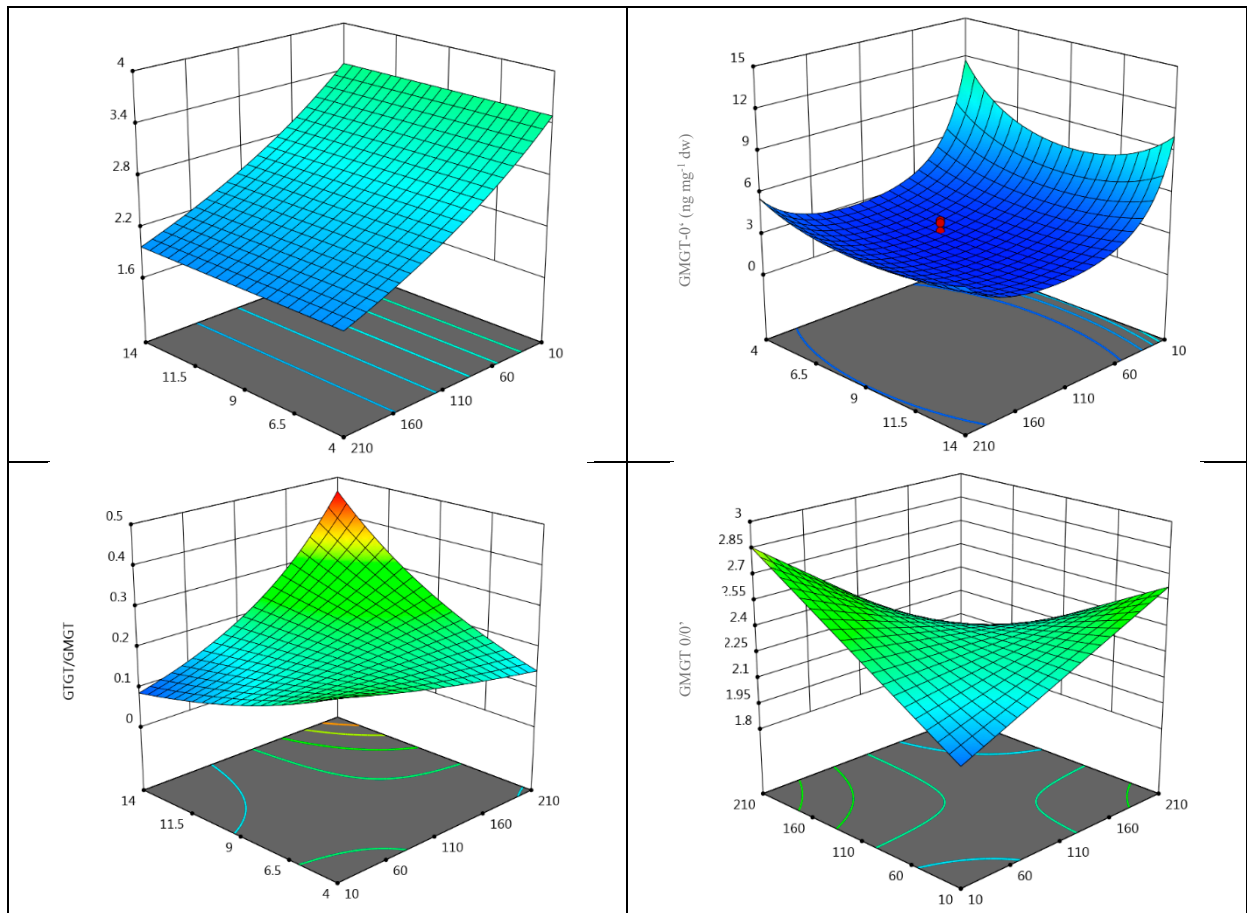

**Figure S4.** Results of the statistical analysis of the DoE. Significant dependences were calculated for GTGT-0, GMGT-0', GTGT/GMGT (including both GMGT isomers), and GMGT-0/0'.

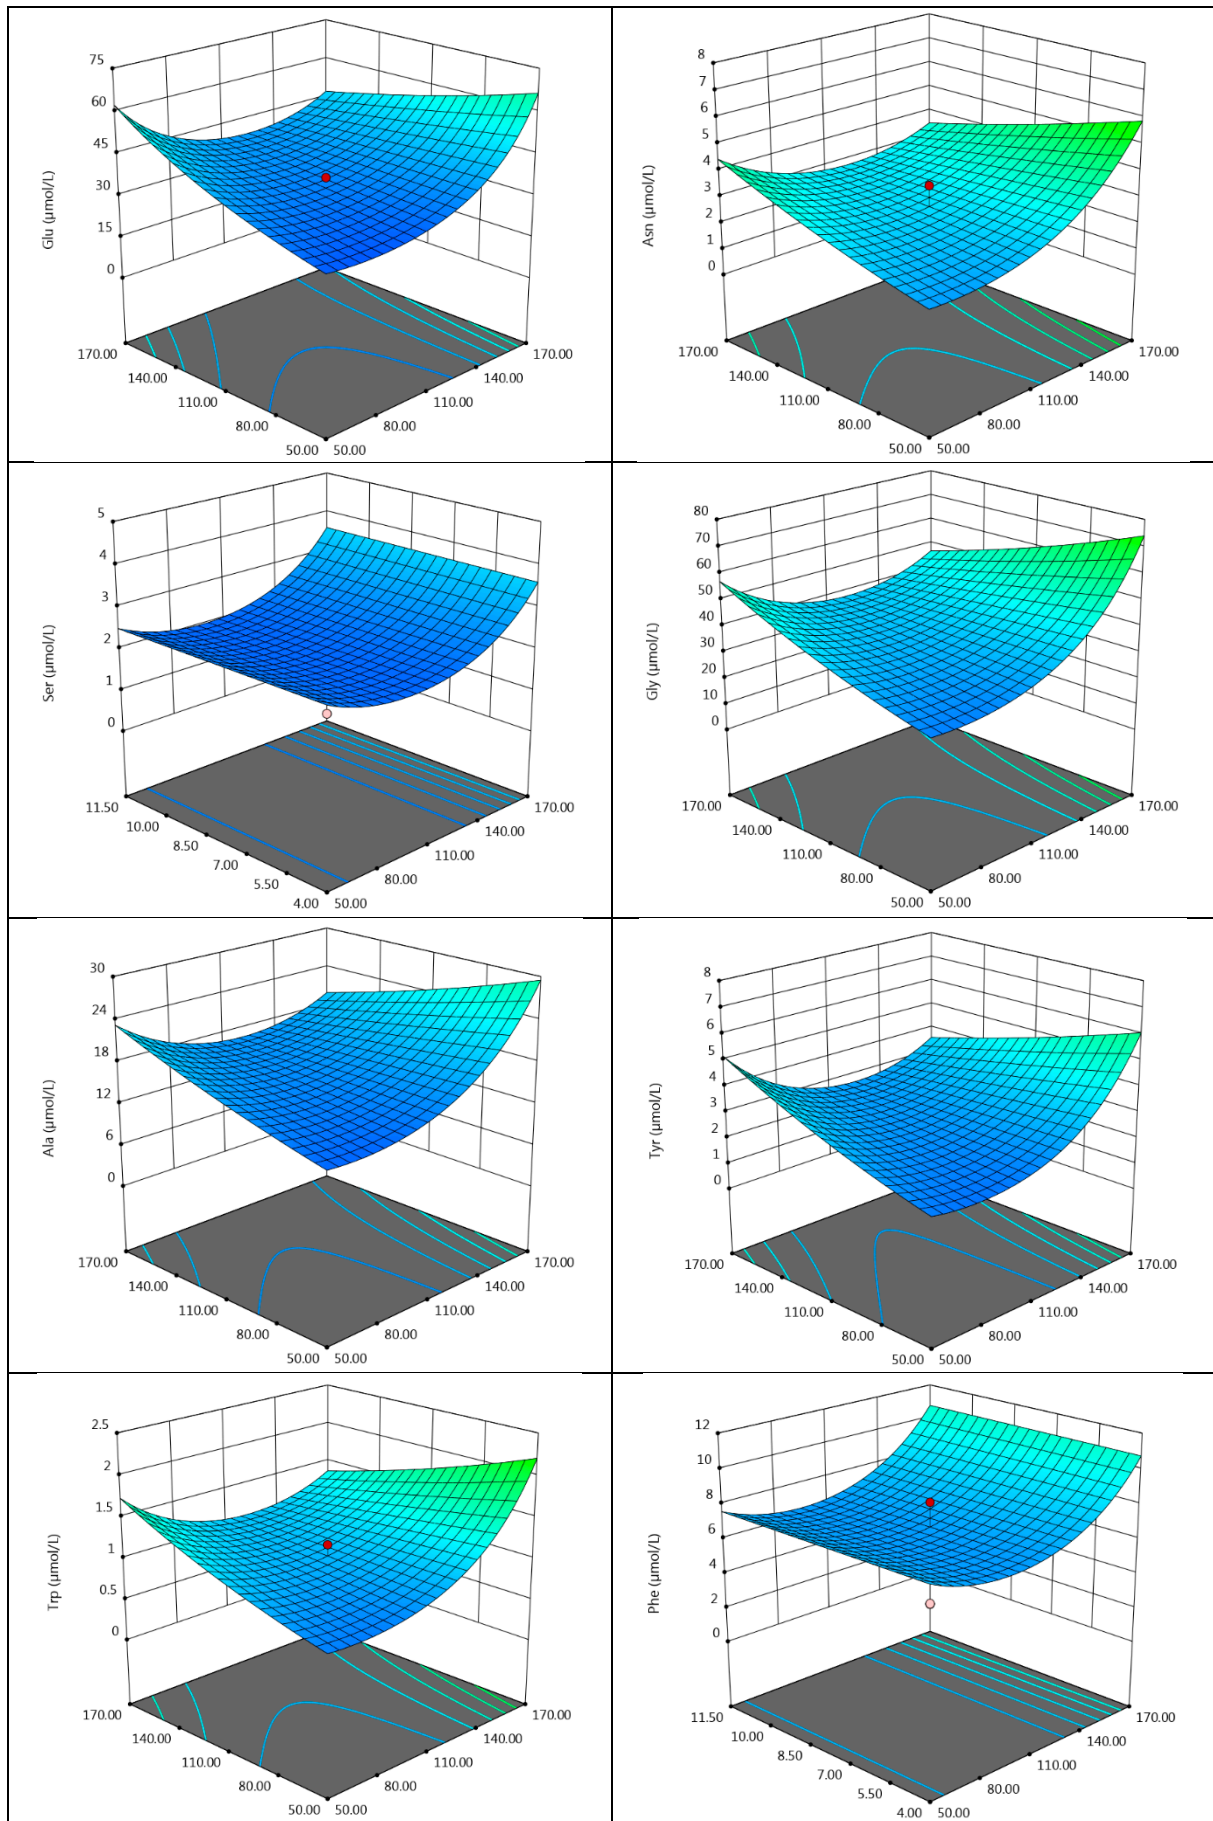

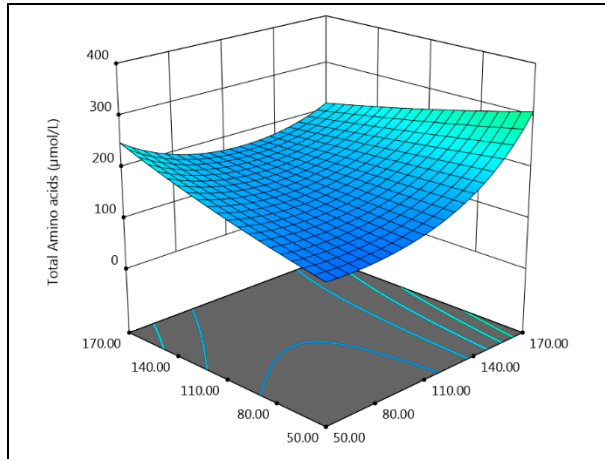

**Figure S5.** Glu (glutamic acid), Asn (asparagine), Ser (serine), Gly (glycine), Ala (alanine), Tyr (tyrosine), Trp (tryptophan), Phe (phenylalanine), and total amino acids show a dependence on CH<sub>3</sub>OH squared.

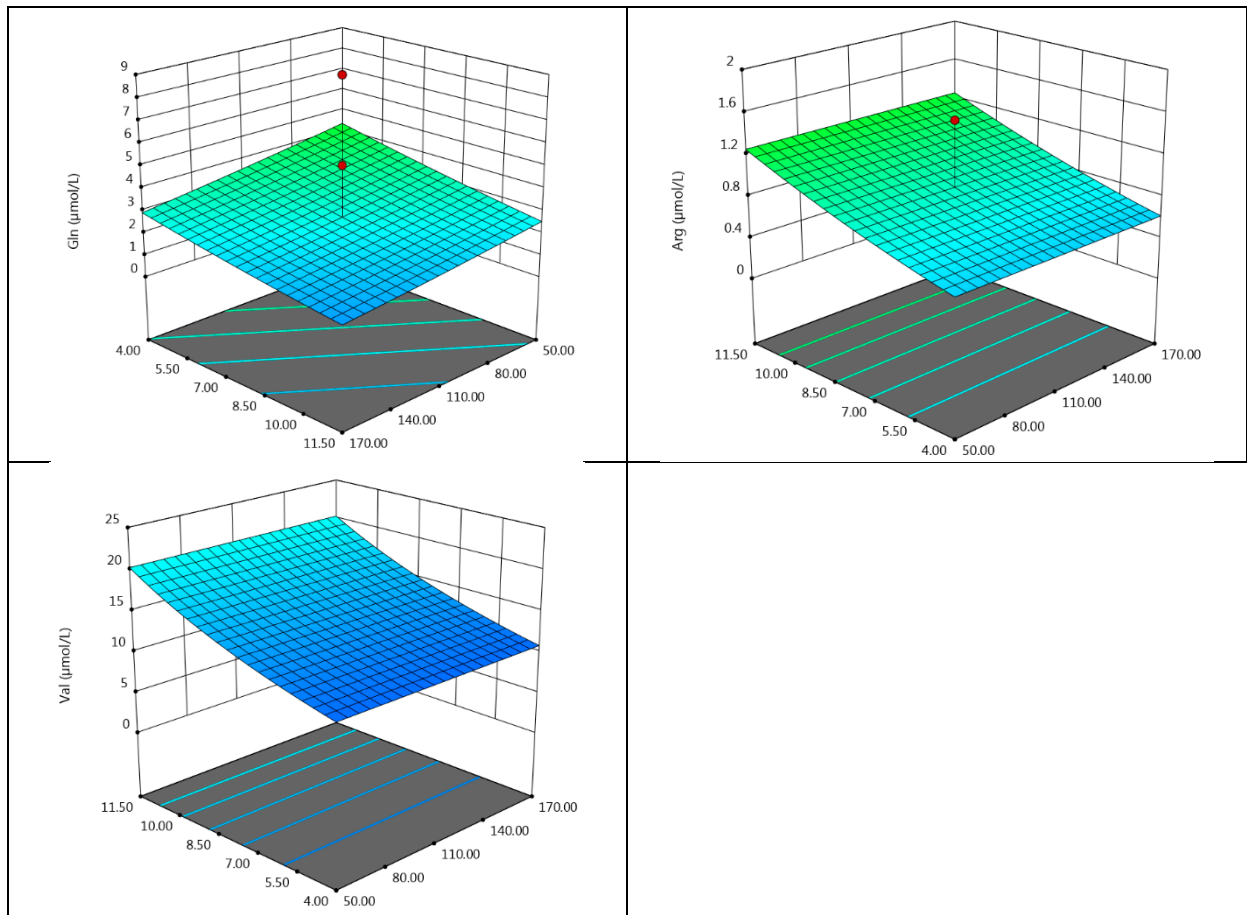

**Figure S6.** Gln (glutamine), Arg (arginine), and Val (valine) are influenced by the presence of  $\text{NH}_4\text{Cl}$ .



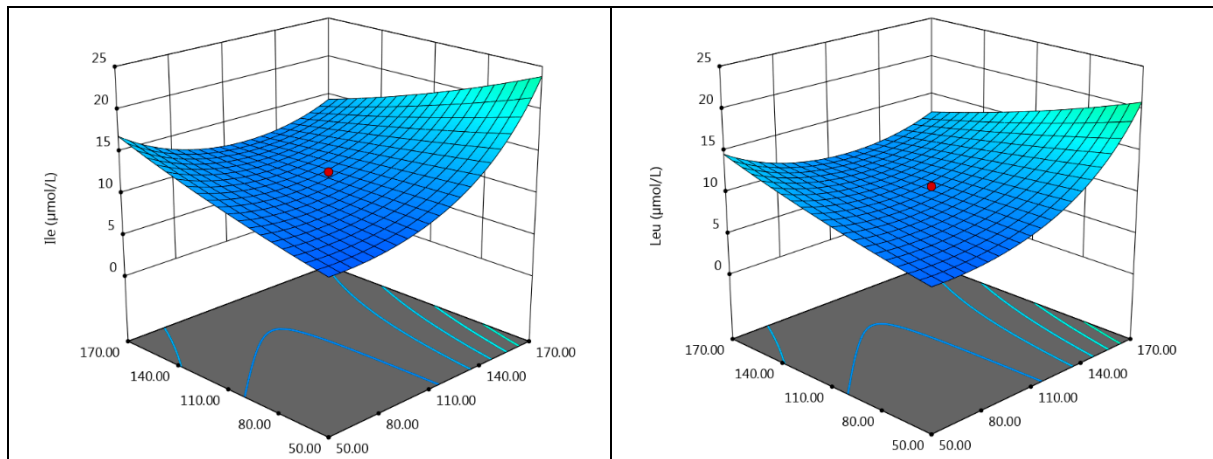

**Figure S7.** Ile (isoleucine) and Leu (leucine) are characterized by the influence of  $\text{NH}_4\text{Cl}$  and  $\text{CH}_3\text{OH}$  squared.

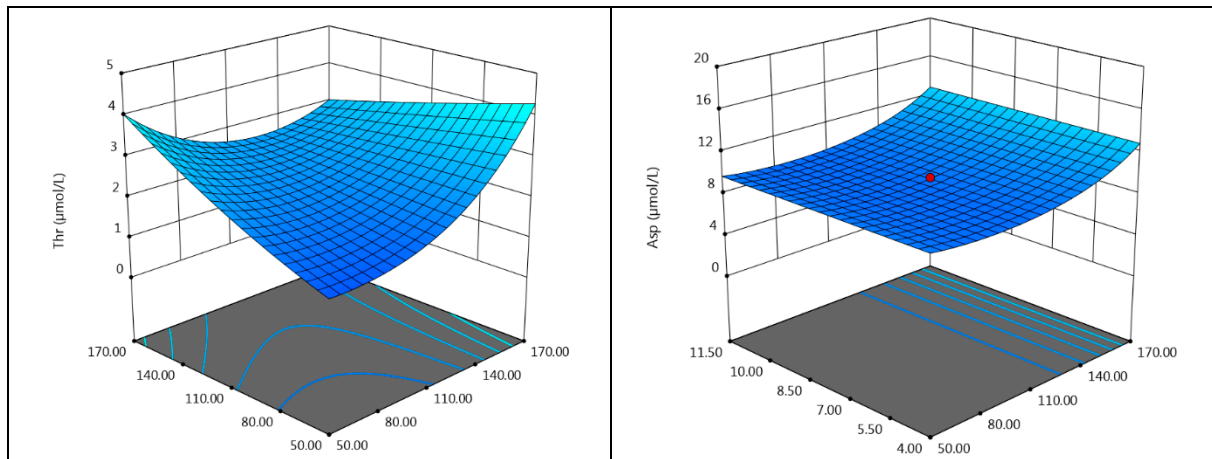

**Figure S8.** Thr (threonine) is influenced by the interaction of CH<sub>3</sub>OH and H<sub>2</sub>CO and CH<sub>3</sub>OH squared, and Asp (aspartic acid) shows no specific dependency at all.

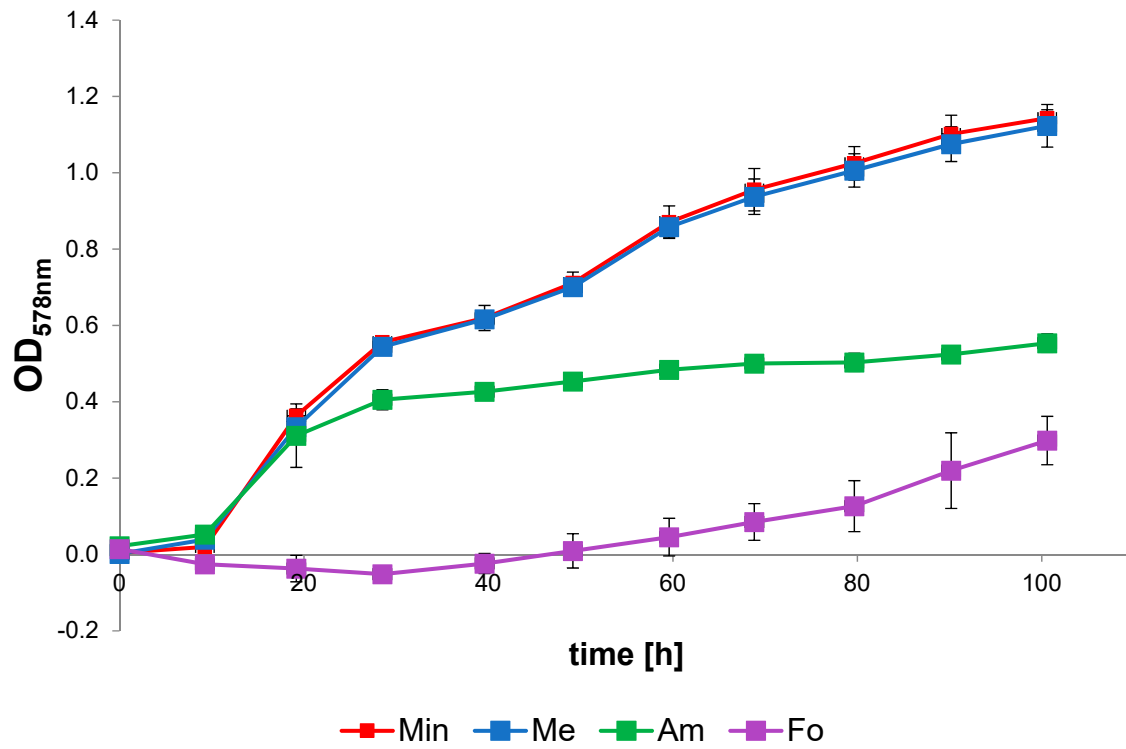

**Figure S9.** Average growth curves of the four different experiments (n=4, the OD of the respective zero control was subtracted, error bars present respective standard deviations).

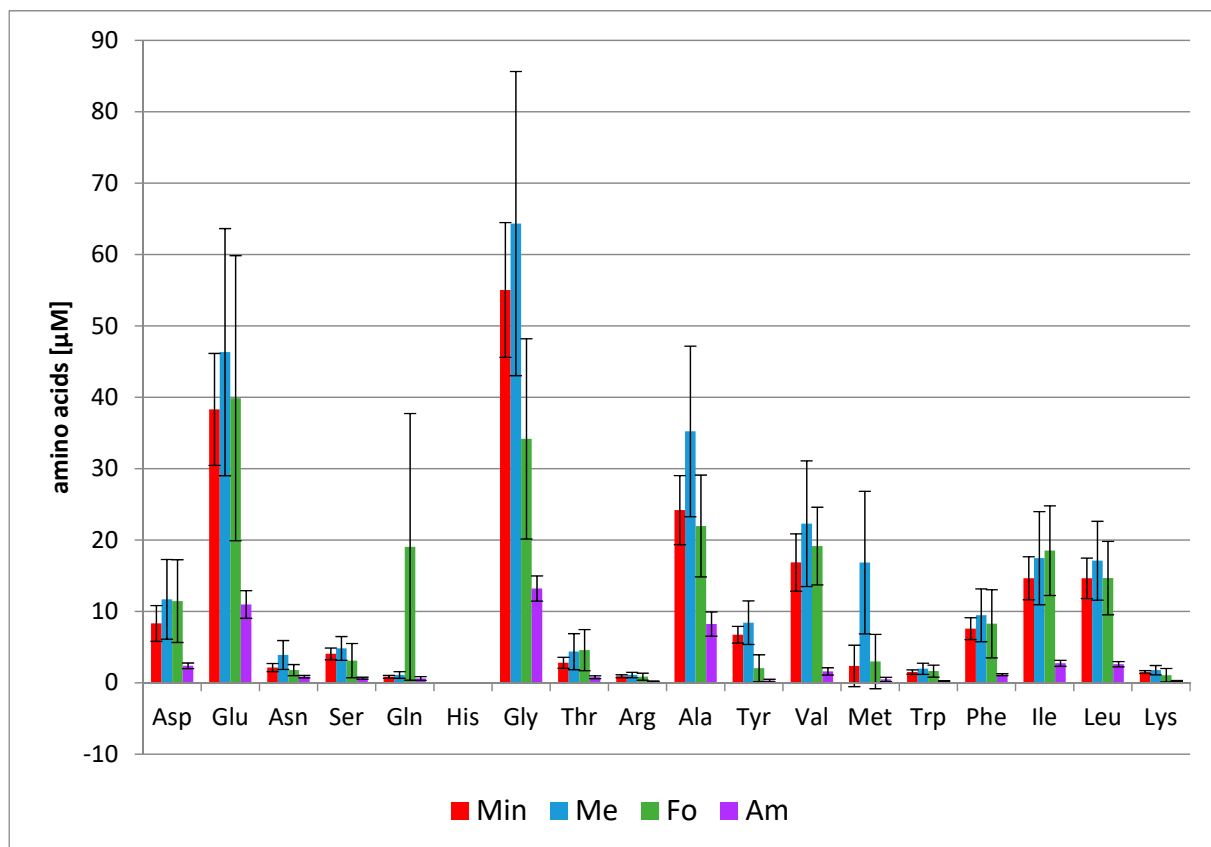

**Figure S10.** Concentrations of the different amino acids for the four different experimental settings (n=4, error bars present respective standard deviations). The high error of Gln for the “Fo”-setting is caused by a wide spreading of the data points between 4 and 46  $\mu\text{M}$ . However, even the error is high, all single samples of the “Fo”-set showed a value far higher in Gln than in any other sample. Abbreviations of amino acids: Asp = aspartic acid; Glu = glutamic acid; Asn = asparagine; Ser = serine; Gln = glutamine; His = histidine; Gly = glycine; Thr = threonine; Arg = arginine; Ala = alanine; Tyr = tyrosine; Val = valine; Met = methionine; Trp = tryptophan; Phe = phenylalanine; Ile = isoleucine; Leu = leucine; Lys = lysine.
